# Supplementary material
Source: PubMed Central journal article supplement (PMC6957716)

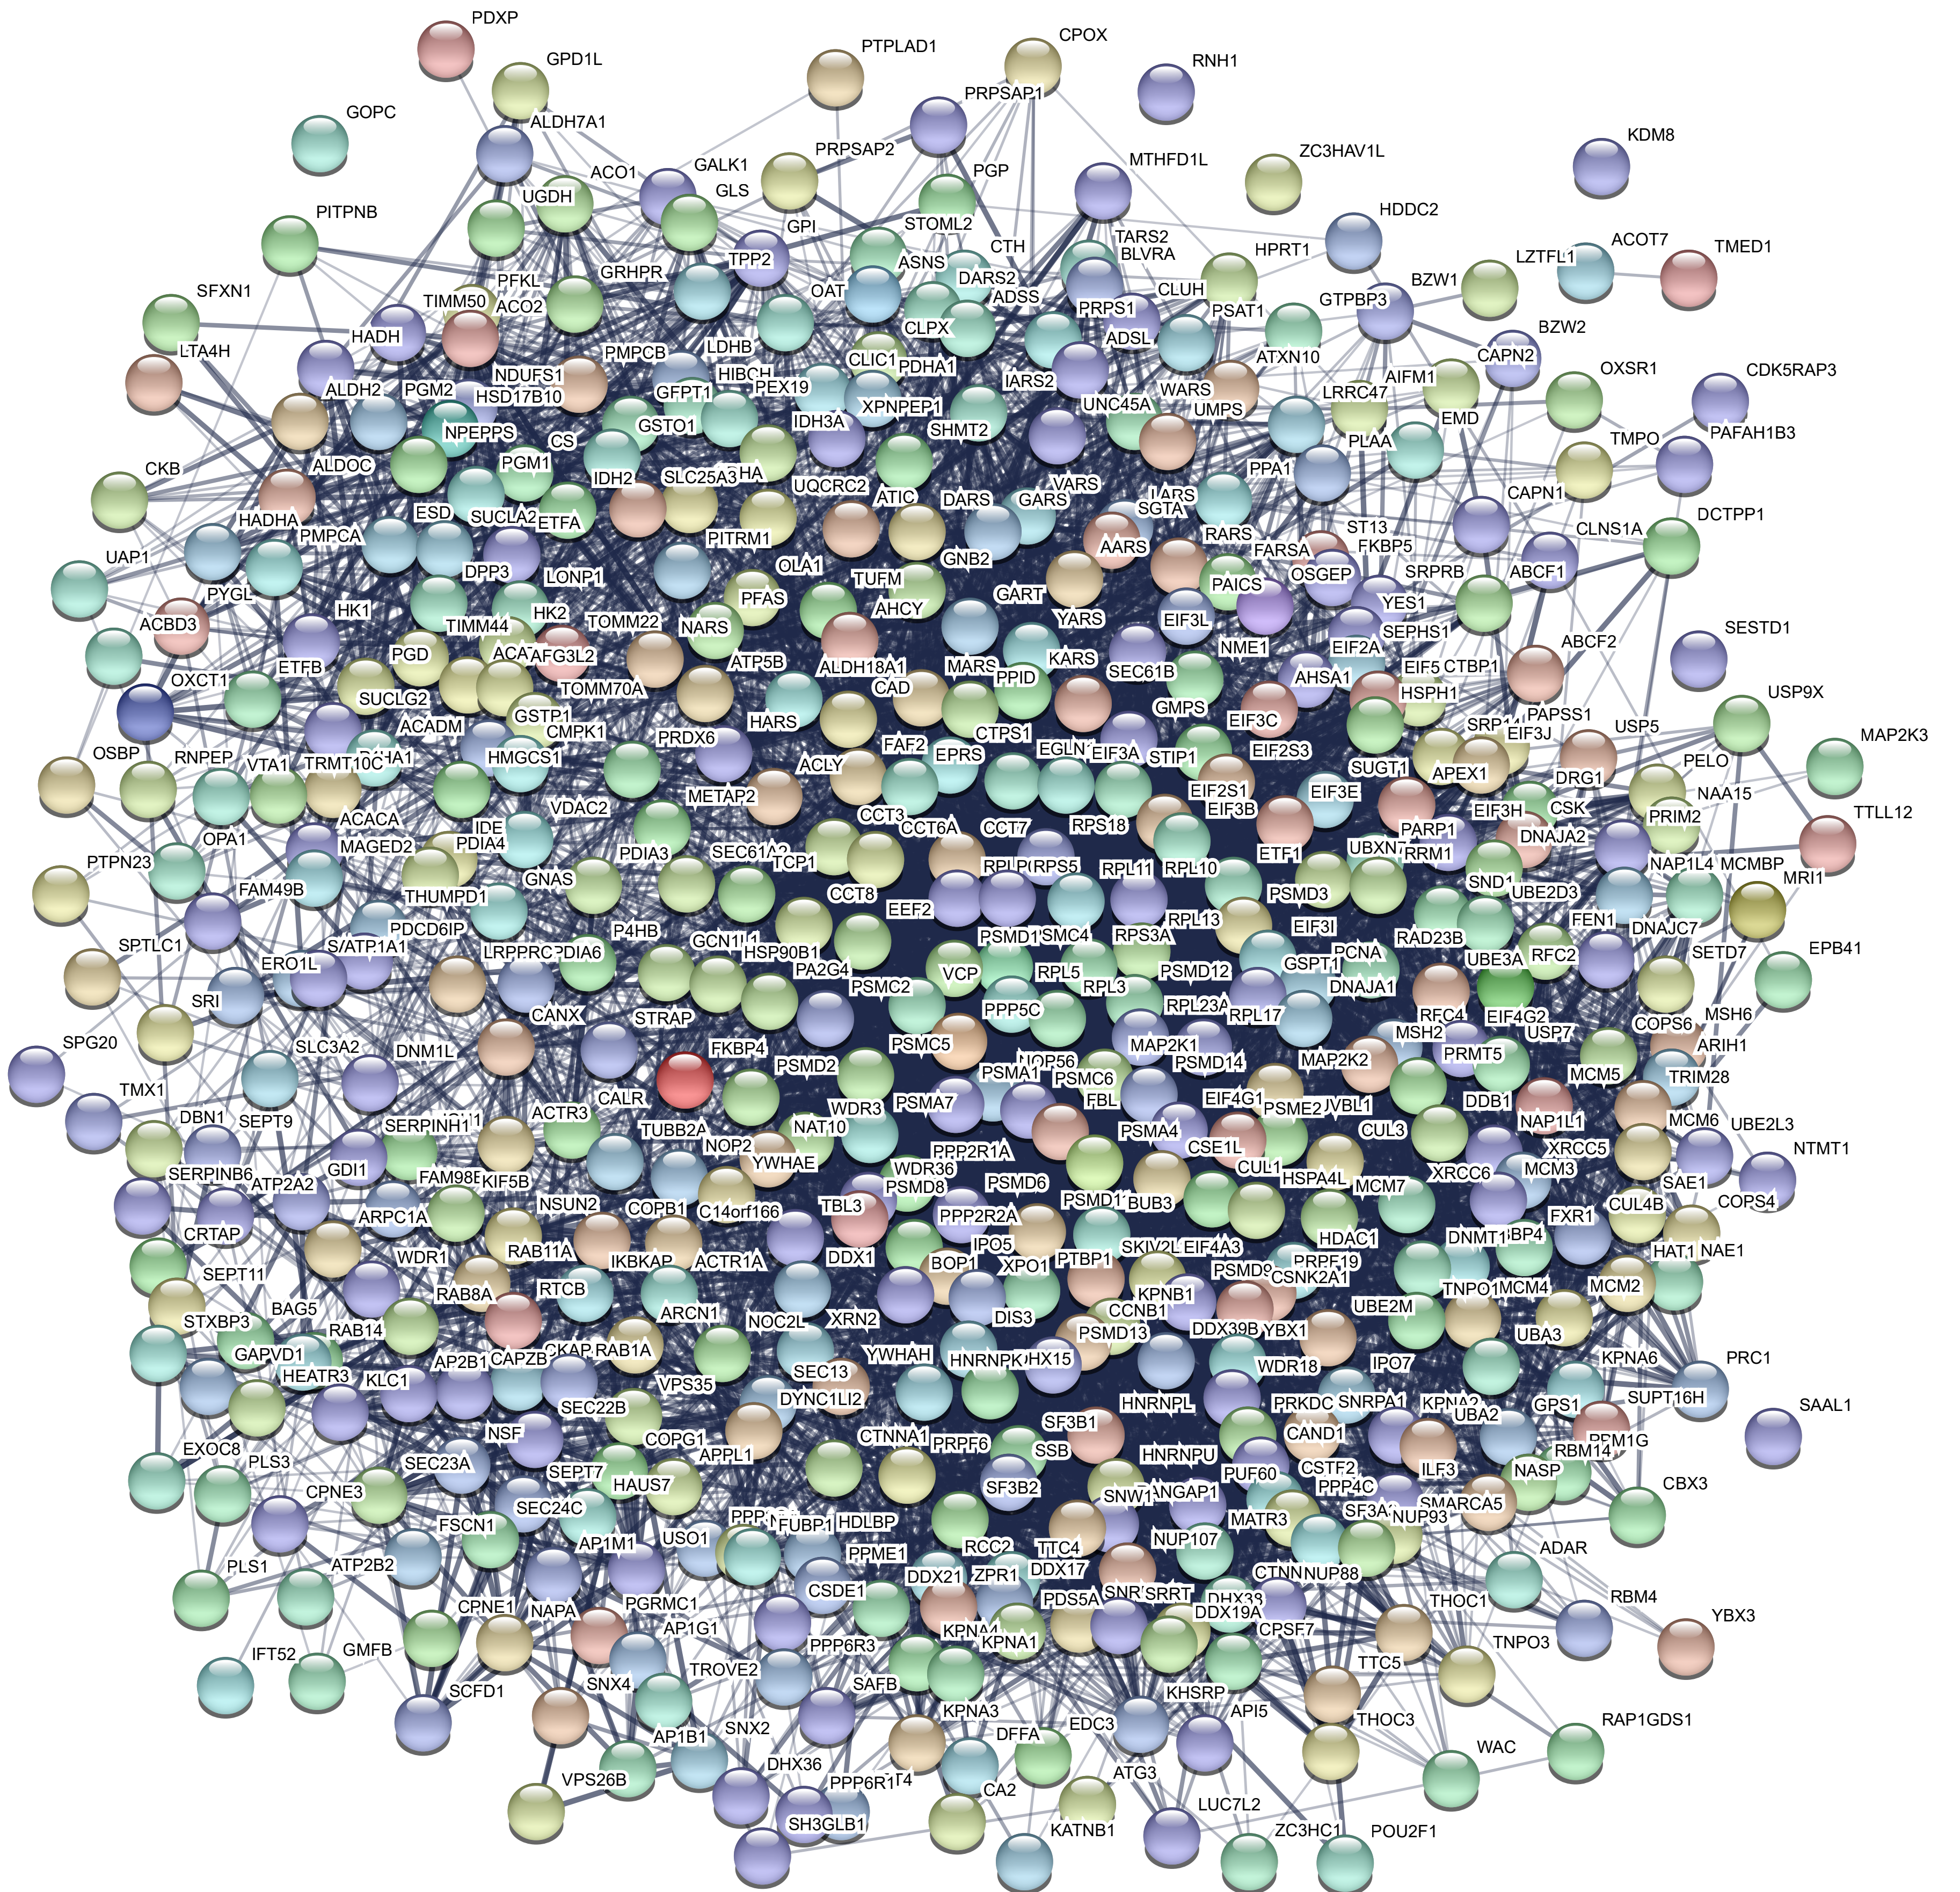

Supplement: NIHMS1063707-supplement-Supplement_5.pdf [file NIHMS1063707-supplement-Supplement_5.pdf]
